# Supplementary material for: Calcium-atom-modified boron phosphide (BP) biphenylene as an efficient hydrogen storage material
Source: Royal Society of Chemistry journal article supplement (doi:10.1039/d4ra07271e), 2024-01-01
Supplement: d4ra07271e1.pdf [file d4ra07271e1.pdf]

## Supporting Information: Calcium atom modified boron phosphide (BP) biphenylene as an efficient hydrogen storage material

Yusuf Zuntu Abdullahi<sup>a,b</sup>, Ikram Djebablia<sup>c,d,\*</sup>, Tiem Leong Yoon<sup>e</sup>, Lim Thong Leng<sup>f</sup>

<sup>a</sup>*Department of Physics, Aydin Adnan Menderes University, Aydin 09010, Turkey.,*

<sup>b</sup>*Department of Physics, Faculty of Science, Kaduna State University, P.M.B. 2339 Kaduna State, Nigeria.,*

<sup>c</sup>*Radiation and Matter Physics Laboratory, Matter Sciences Department, Mohamed-Cherif Messaadia University, P.O. Box 1553, Souk-Ahras, 41000, Algeria,*

<sup>d</sup>*Physics laboratory at Guelma, Faculty of Mathematics, Computing and Material Sciences, University 8 May 1945 Guelma, P.O. Box 401, Guelma 24000, Algeria.,*

<sup>e</sup>*School of Physics Universiti Sains Malaysia 11800 Penang Malaysia.*

<sup>f</sup>*Faculty of Engineering and Technology Multimedia University Jalan Ayer Keroh Lama 75450 Melaka Malaysia.*

---

\*ik.djebablia@univ-soukahras.dz

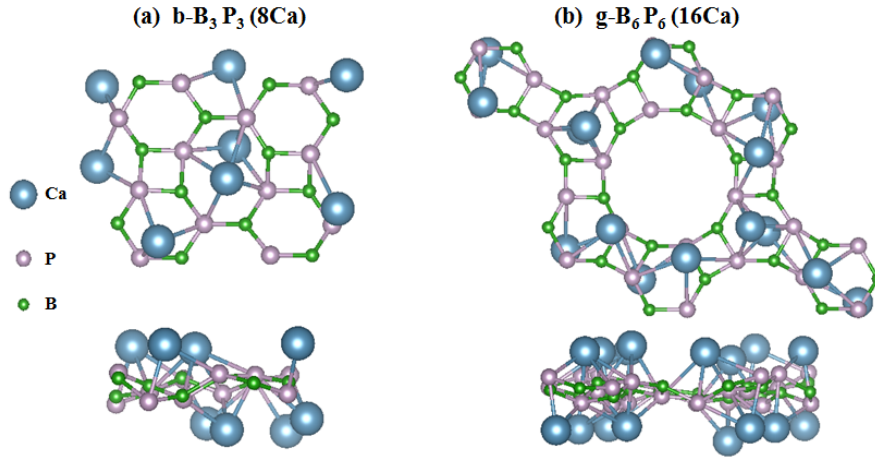

Figure 1: Relaxed structures of (a)  $b - B_3P_3(Ca)$  and (b)  $g - B_6P_6(Ca)$  structures.

To provide a hint on the bonding nature of  $b - B_3P_3(8Ca)$  and  $g - B_6P_6(16Ca)$  structures, the total density of states (TDOS) and projected density of states (PDOS) are plotted in Fig. S2. It is evident from the plots that an interesting change in the PDOS occurs, with the emergence of new states at the Fermi level due to the overlapping of the electronic states of the Ca atoms with those of the BP surface.

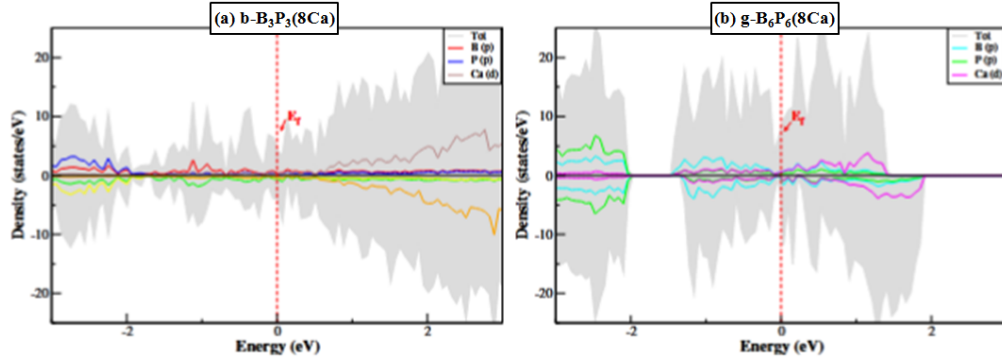

Figure 2: Total (TDOS) and Projected (PDOS) Density of States of (a)  $b - B_3P_3(Ca)$  and (b)  $g - B_6P_6(Ca)$  structures: Highlighting B (p), P (p), and Ca (d) Contributions

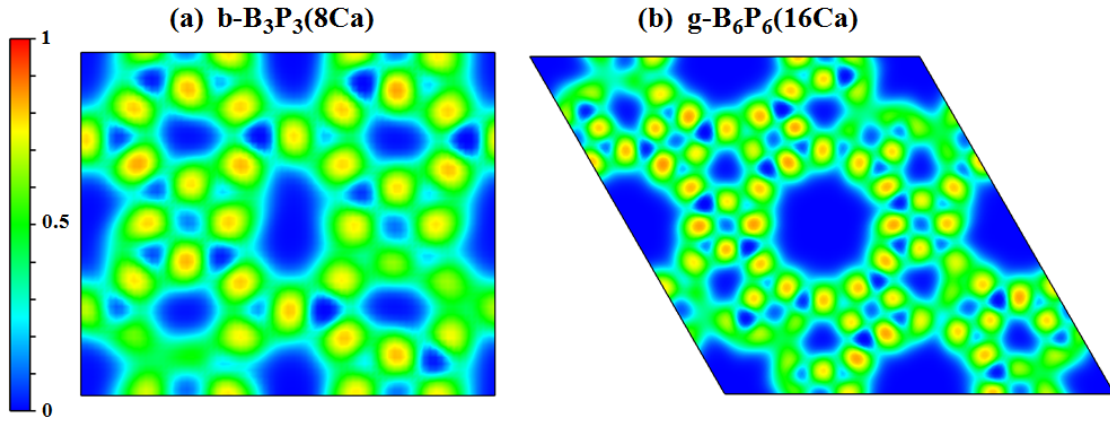

Figure 3: Electron Localization Function (ELF) of (a)  $b - B_3P_3(8Ca)$  and (b)  $g - B_6P_6(16Ca)$  structures.

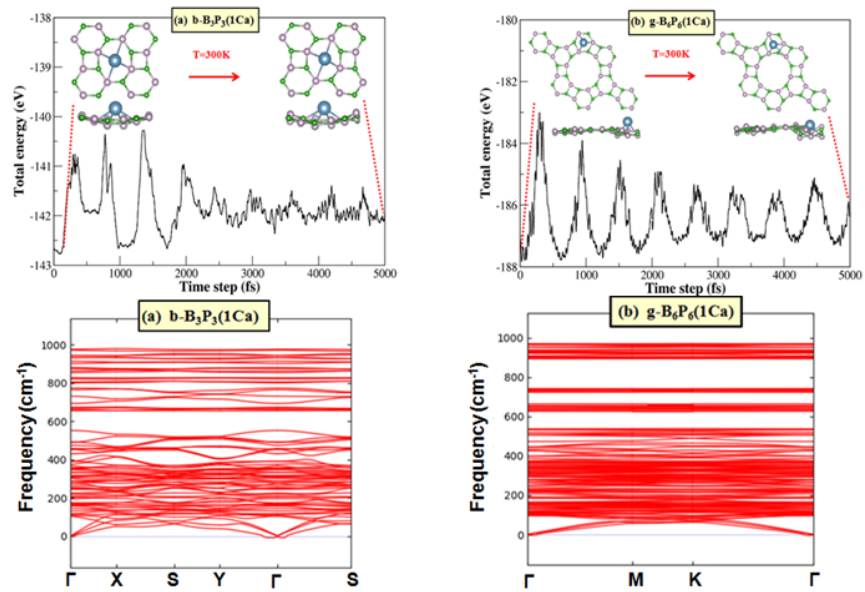

Figure 4: Molecular dynamics simulation of (a)  $b - B_3P_3(8Ca)$  and  $g - B_3P_3(16Ca)$  structures at T=300K

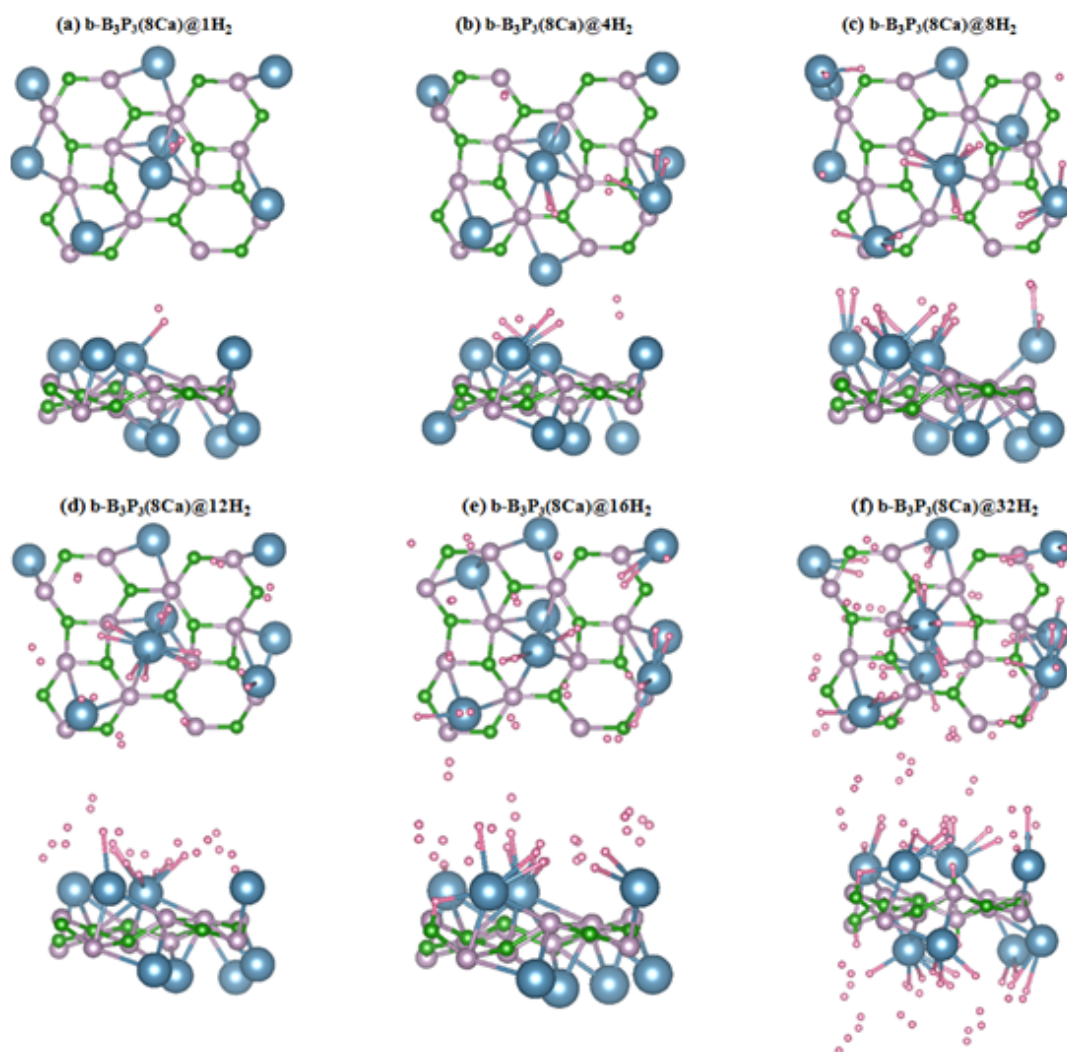

Figure 5: Optimized structures of several  $H_2$  molecules ( $1H_2, 4H_2, 8H_2, 12H_2, 16H_2, 32H_2$ ) on  $b - B_3P_3(8Ca)$  structure: Top and side views

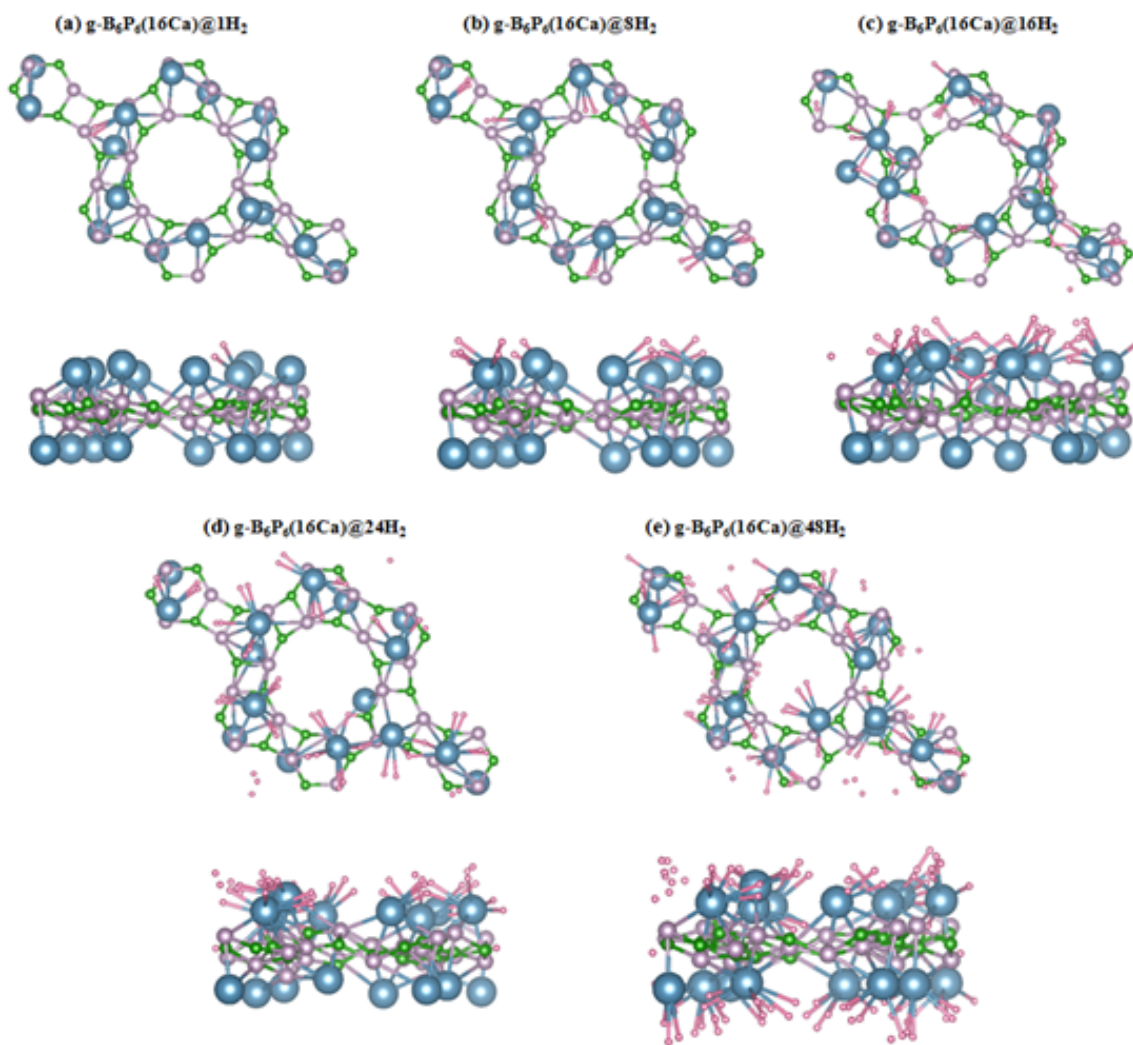

Figure 6: Optimized structures of several  $\text{H}_2$  molecules ( $1\text{H}_2$ ,  $8\text{H}_2$ ,  $16\text{H}_2$ ,  $24\text{H}_2$ ,  $48\text{H}_2$ ) on  $g\text{-B}_6\text{P}_6(8\text{Ca})$  structure: Top and side views

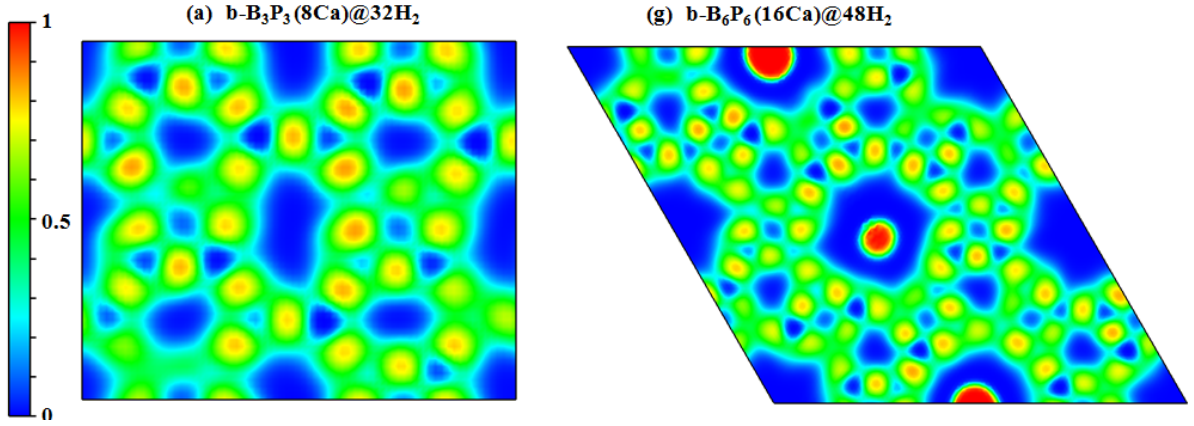

Figure 7: Electron Localization Function (ELF) of (a)  $b - B_3P_3(8Ca)@32H_2$  and (b)  $g - B_3P_3(8Ca)@48H_2$  structure.

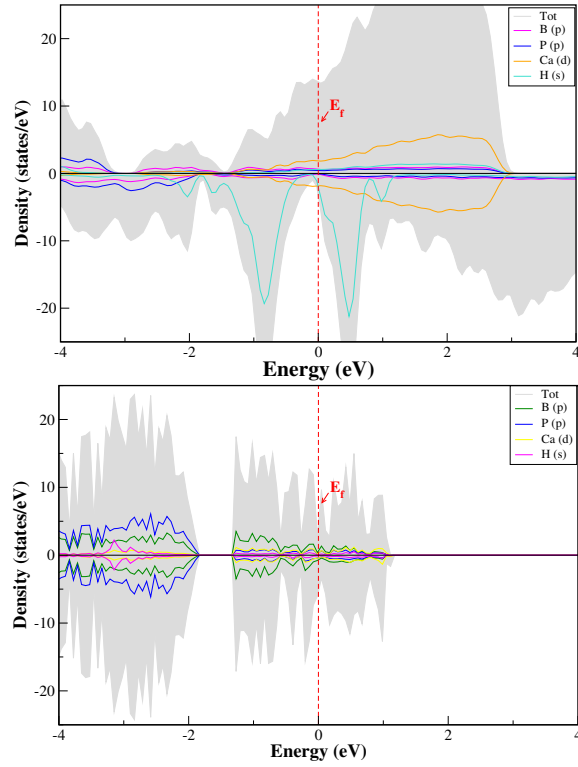

Figure 8: Total (TDOS) and Projected (PDOS) Density of States of (a)  $b - B_3P_3(8Ca)@32H_2$  and (b)  $g - B_6P_6(16Ca)@48H_2$  structures: Highlighting B (p), P (p), and Ca (d) and H (s) Contributions
